# Supplementary material for: Measuring Appropriate Antibiotic Prescribing in Acute Hospitals: Development of a National Audit Tool Through a Delphi Consensus
Source: MDPI journal article supplement (doi:10.3390/antibiotics8020049), 2019-04-29
Supplement: s1 [file s1]

**Table S1: Round 1 Delphi Results**

| Variable                               | Was the antibiotic indicated and necessary at the start date? |                                                       | Was the antibiotic continued after infection was ruled out? |                                                       | Was the antibiotic continued beyond the standard duration without explanation? |                                                       | Round 1 Decision |
|----------------------------------------|---------------------------------------------------------------|-------------------------------------------------------|-------------------------------------------------------------|-------------------------------------------------------|--------------------------------------------------------------------------------|-------------------------------------------------------|------------------|
|                                        | Median Score                                                  | Relevant + Very Relevant Response (% of participants) | Median Score                                                | Relevant + Very Relevant Response (% of participants) | Median Score                                                                   | Relevant + Very Relevant Response (% of participants) |                  |
| 1. Working diagnosis                   | Very Relevant                                                 | 90%                                                   | Relevant                                                    | 68%                                                   | Relevant                                                                       | 58%                                                   | Accepted         |
| 2. Presenting complaint                | Neutral                                                       | 53%                                                   | Neutral                                                     | 32%                                                   | Irrelevant                                                                     | 32%                                                   | Rescore          |
| 3. Documentation of pre-72 hour review | Relevant/<br>Neutral                                          | 56% (1 respondent could not assess)                   | Relevant/<br>Neutral                                        | 47% (1 respondent could not assess)                   | Neutral                                                                        | 47% (2 respondents could not assess)                  | Rescore          |
| 4. Documentation of working diagnosis  | Relevant                                                      | 74%                                                   | Relevant                                                    | 53%                                                   | Neutral                                                                        | 53%                                                   | Accepted         |
| 5. Patient immunocompromised           | Relevant                                                      | 74%                                                   | Neutral                                                     | 42%                                                   | Relevant                                                                       | 53%                                                   | Accepted         |
| 6. Evidence                            | Relevant                                                      | 79%                                                   | Neutral                                                     | 37%                                                   | Neutral                                                                        | 47%                                                   | Accepted         |

|                                                            |               |                                      |                        |                                      |                      |                                      |          |
|------------------------------------------------------------|---------------|--------------------------------------|------------------------|--------------------------------------|----------------------|--------------------------------------|----------|
| of local infection                                         |               |                                      |                        |                                      |                      |                                      |          |
| 7. Confirmation of infection at pre-72 hour review         | Very Relevant | 74%                                  | Relevant/<br>Neutral   | 50% (1 respondent could not assess)  | Relevant             | 58%                                  | Accepted |
| 8. Standard duration of treatment for indication           | Neutral       | 53%                                  | Irrelevant             | 21%                                  | Very Relevant        | 90%                                  | Accepted |
| 9. Finalised diagnosis                                     | Very Relevant | 63%                                  | Neutral                | 63%                                  | Relevant/<br>Neutral | 68%                                  | Accepted |
| 10. NEWS score at course start                             | Relevant      | 84%                                  | Neutral                | 32%                                  | Neutral              | 42%                                  | Accepted |
| 11. NEWS score at day 5-7                                  | Irrelevant    | 21%                                  | Neutral                | 42%                                  | Relevant             | 53%                                  | Accepted |
| 12. qSOFA score at course start                            | Relevant      | 67% (1 respondent could not assess)  | Neutral/<br>Irrelevant | 6% (1 respondent could not assess)   | Neutral              | 16% (1 respondent could not assess)  | Accepted |
| 13. qSOFA score at day 5-7                                 | Irrelevant    | 13% (3 respondents could not assess) | Neutral                | 29% (2 respondents could not assess) | Relevant             | 53% (2 respondents could not assess) | Accepted |
| 14. Highest CRP level in previous 24 hours at course start | Relevant      | 84%                                  | Neutral                | 32%                                  | Neutral              | 37%                                  | Accepted |

|                                                            |               |                                      |          |                                      |          |                                      |          |
|------------------------------------------------------------|---------------|--------------------------------------|----------|--------------------------------------|----------|--------------------------------------|----------|
| 15. Highest CRP level in previous 24 hours at day 5-7      | Irrelevant    | 21%                                  | Relevant | 47%                                  | Relevant | 63%                                  | Accepted |
| 16. Highest WBC level in previous 24 hours at course start | Relevant      | 79%                                  | Neutral  | 42%                                  | Relevant | 47%                                  | Accepted |
| 17. Highest WBC level in previous 24 hours at day 5-7      | Irrelevant    | 26%                                  | Neutral  | 42%                                  | Relevant | 63%                                  | Accepted |
| 18. Drug name                                              | Very Relevant | 58%                                  | Neutral  | 47%                                  | Relevant | 53%                                  | Accepted |
| 19. Start date and time of drug                            | Relevant      | 63%                                  | Neutral  | 47%                                  | Relevant | 53%                                  | Accepted |
| 20. Stop date and time of drug                             | Irrelevant    | 32%                                  | Relevant | 63%                                  | Relevant | 68%                                  | Accepted |
| 21. Antibiotic indicated                                   | Very Relevant | 82% (2 respondents could not assess) | Relevant | 59% (2 respondents could not assess) | Relevant | 47% (2 respondents could not assess) | Accepted |
| 22. Blood culture identified                               | Relevant      | 63%                                  | Relevant | 74%                                  | Relevant | 74%                                  | Accepted |

|                                     |               |                                      |          |                                      |               |                                      |          |
|-------------------------------------|---------------|--------------------------------------|----------|--------------------------------------|---------------|--------------------------------------|----------|
| 23. Other specimens sent            | Neutral       | 37%                                  | Relevant | 63%                                  | Relevant      | 53%                                  | Accepted |
| 24. Antibiotic necessary in regimen | Very Relevant | 75% (3 respondents could not assess) | Neutral  | 44% (3 respondents could not assess) | Relevant      | 50% (3 respondents could not assess) | Accepted |
| 25. Pathogen identified             | Relevant      | 68%                                  | Relevant | 63%                                  | Very Relevant | 79%                                  | Accepted |
